# Supplementary material for: In Situ Activation of Pituitary-Infiltrating T Lymphocytes in Autoimmune Hypophysitis
Source: PubMed Central journal article supplement (PMC5337949; doi:10.1038/srep43492), 2017-03-06

## ***In Situ* Activation of Pituitary-Infiltrating T Lymphocytes in Autoimmune Hypophysitis**

Han-Huei Lin, Angelika Gutenberg, Tzu-Yu Chen, Nu-man Tsai, Chia-Jung Lee, Yu-Che Cheng, Wen-Hui Cheng, Ywh-Ming Tzou, Patrizio Caturegli and Shey-Cherng Tzou

### **Supplementary information**

**Supplementary Table 1. Diagnosis and Main Clinical Data of patients with lymphocytic hypophysitis in this study.**

| <b>Patient</b> | <b>Age (yrs)/<br/>gender</b> | <b>Presenting symptoms</b>                                                                                                   | <b>Glucocorticoids<br/>before surgery</b> | <b>Other<br/>autoimmune<br/>diseases</b> | <b>Pregnancy</b>             |
|----------------|------------------------------|------------------------------------------------------------------------------------------------------------------------------|-------------------------------------------|------------------------------------------|------------------------------|
| A <sup>1</sup> | 33/M                         | 9 years before operation due to sellar inflammatory granuloma, 5 years of chiasma syndrome, 6 months of visual deterioration | Yes<br>(Prednisolone)                     | no                                       | n.a.                         |
| B <sup>1</sup> | 33/F                         | 2 months of progredient visual deterioration, diabetes insipidus, headache and vomiting in the last months of pregnancy      | no                                        | no                                       | 3 <sup>rd</sup><br>trimester |
| C <sup>2</sup> | 32/M                         | 4 months of headaches and visual disturbances                                                                                | Yes<br>(Prednisolone)                     | no                                       | n.a.                         |
| D <sup>2</sup> | 60/M                         | Over 2 yrs of bifrontal headaches                                                                                            | no information                            | no                                       | n.a                          |
| E <sup>2</sup> | 27/F                         | Secondary amenorrhea                                                                                                         | no                                        | no                                       | no                           |
| F <sup>1</sup> | 32/M                         | 5 months of diabetes insipidus, impotence and depressions                                                                    | no                                        | no                                       | n.a.                         |
| G <sup>2</sup> | 56/F                         | 12 months of headache, loss of secondary hairs, loss of libido, adynamia                                                     | no                                        | no                                       | no                           |
| H              | 62/M                         | 7 months of headache, loss of secondary hairs                                                                                | no                                        | no                                       | no                           |

- 1 Gutenberg, A., Buslei, R., Fahlbusch, R., Buchfelder, M. & Bruck, W. Immunopathology of primary hypophysitis: implications for pathogenesis. *Am J Surg Pathol* **29**, 329-338 (2005).
- 2 Gutenberg, A. *et al.* Primary hypophysitis: clinical-pathological correlations. *European journal of endocrinology* **155**, 101-107, doi:10.1530/eje.1.02183 (2006).

**Supplementary Table 2. Percentage of proliferating cells in the mouse pituitary gland that developed autoimmune hypophysitis.**

| <b>Cell types</b>                                | <b>% of proliferating cells in the cell type</b> |
|--------------------------------------------------|--------------------------------------------------|
| <b>Nonhematopoietic cells (CD45<sup>-</sup>)</b> | 0.6%                                             |
| <b>Hematopoietic cells (CD45<sup>+</sup>)</b>    | 8.4%                                             |
| T cells (CD3 <sup>+</sup> )                      | 11.0%                                            |
| CD4 <sup>+</sup> T cells                         | 5.7%                                             |
| CD8 <sup>+</sup> T cells                         | 10.3%                                            |
| B cells (B220 <sup>+</sup> )                     | 2.9%                                             |
| Dendritic cells/macrophage                       | 3.2%                                             |

**Supplementary Figure 1. Cytokine production by pituitary-infiltrating cells and splenocytes in mouse autoimmune hypophysitis.** Single-cell suspensions from the pituitaries (**a**) or from the spleens (**b**) of CFA-immunized mice and mGH-immunized mice were stimulated by mGH. Cytokine production after stimulation was detected by cytokine array membranes. Signal intensity, expressed as Arbitrary Signal Units, was measured and plotted for two groups of mice. Differences in the cytokine level, expressed as Fold Change (mGH vs. CFA), were derived by dividing the signal intensity of mGH group by the signal intensity of the CFA group.

**a**

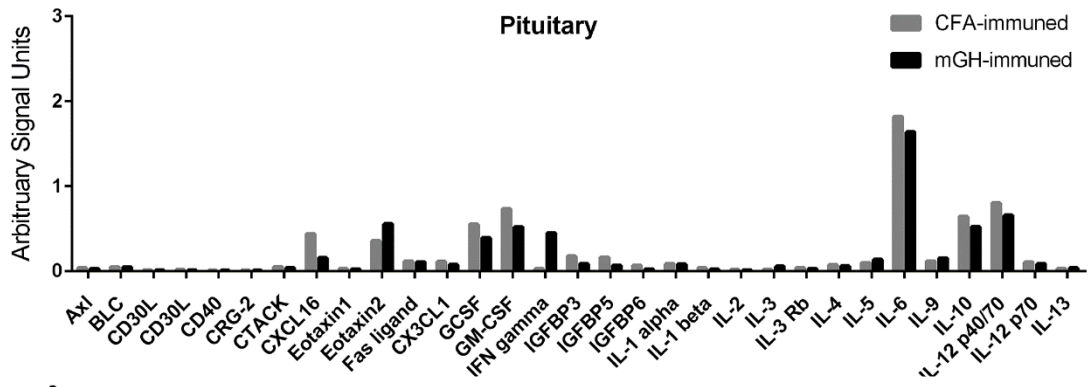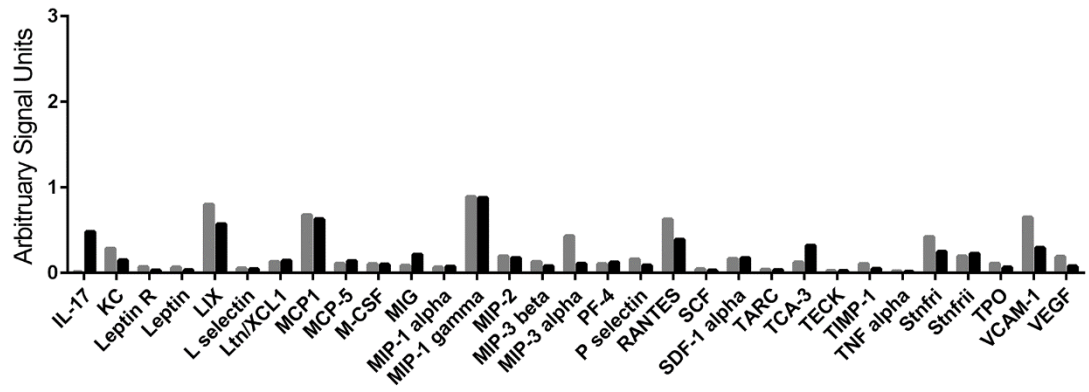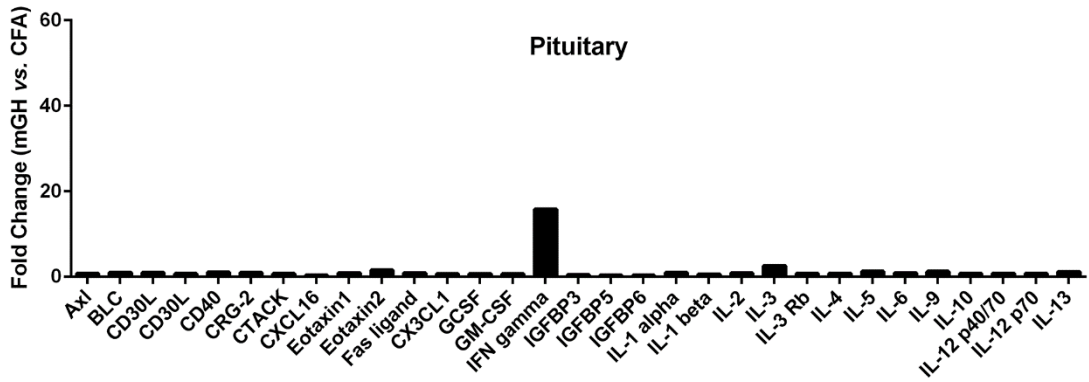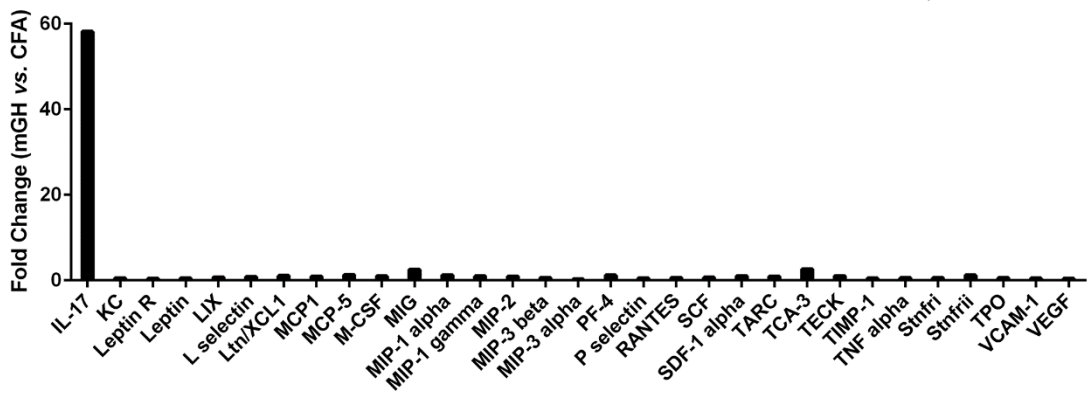

**b**

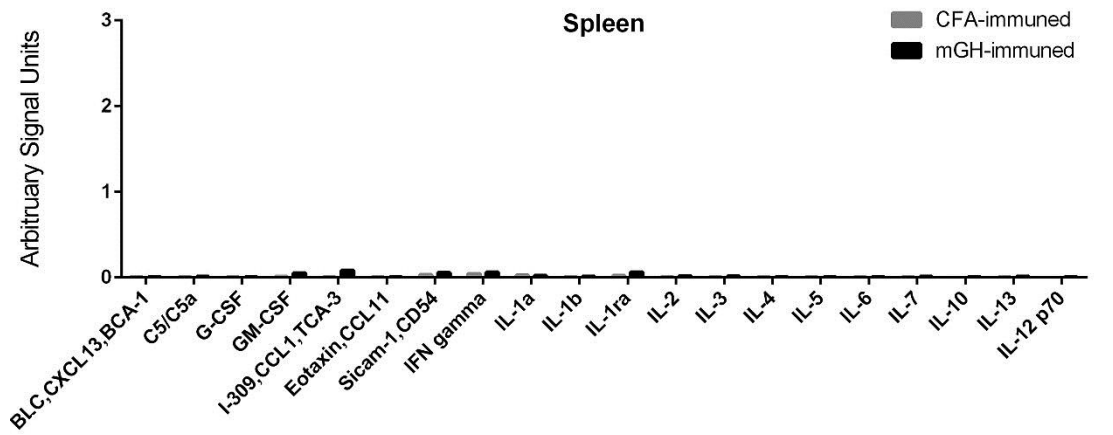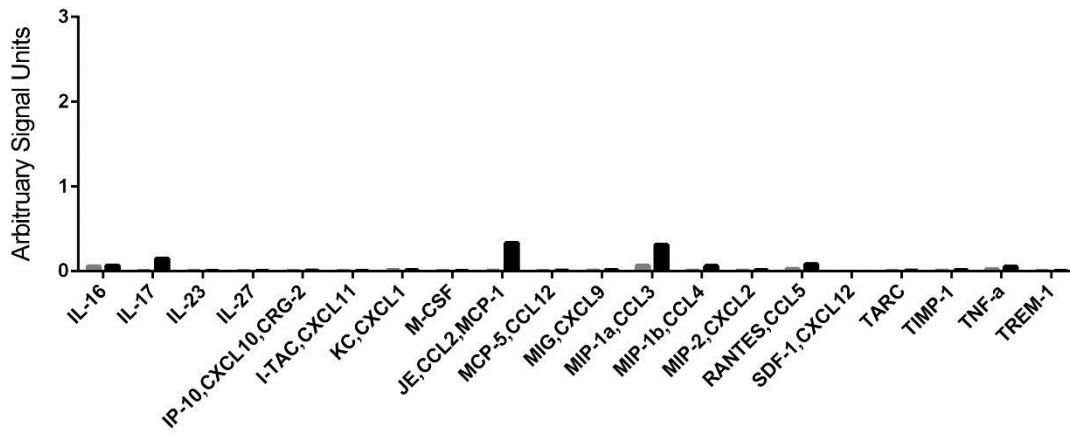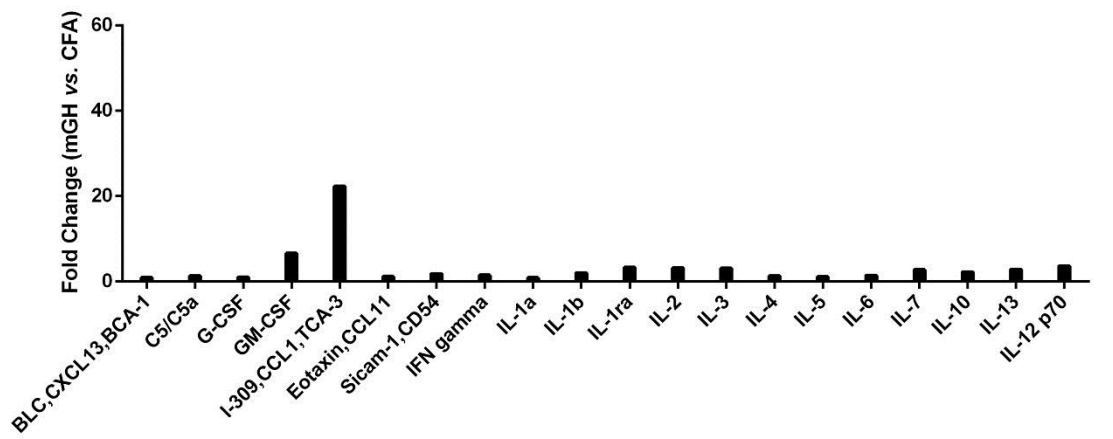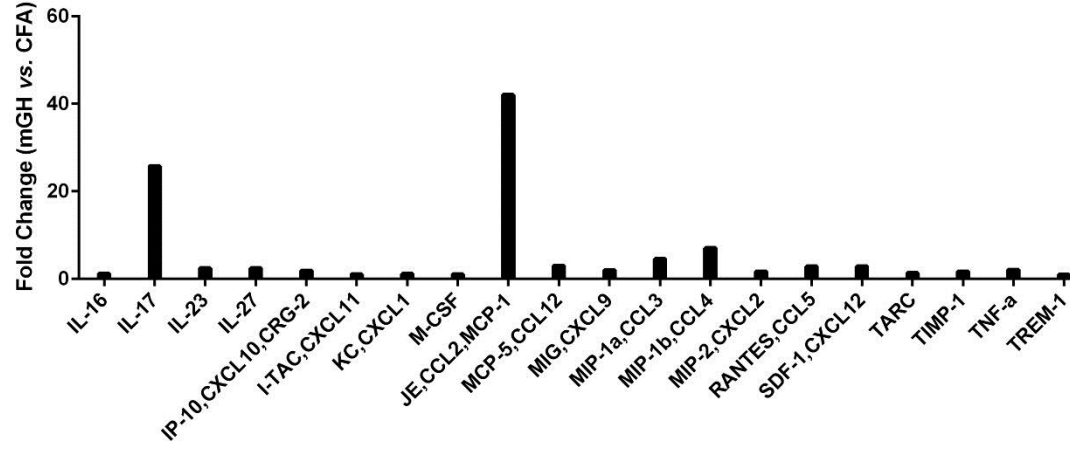

**Supplementary Figure 2. Lymphocytic infiltration in the pituitary gland of mouse autoimmune hypophysitis in a mid-late stage (day 56).** Chronic lymphocytic infiltration developed in the pituitary after immunization with mouse growth hormone. Note the dense aggregated lymphocytic infiltration in the pituitary section.

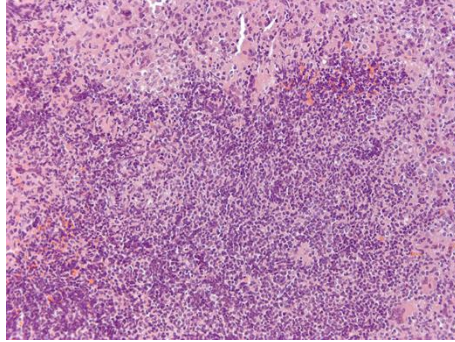

**Supplementary Figure 3. Proliferation of multinucleated giant cells in the pituitary gland of mouse autoimmune hypophysitis.** Multinucleated giant cells (arrow) in the pituitary sections of mice that develop autoimmune hypophysitis on day 56 were stained by PCNA (in red) but not CD3 (in blue).

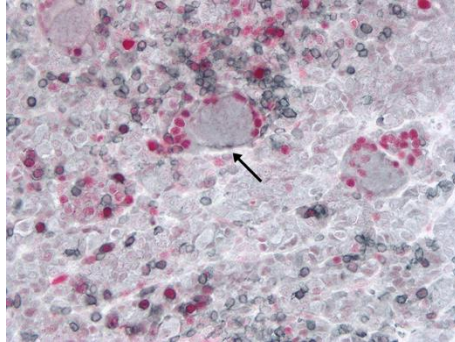

Supplement: srep43492-s1.pdf [file srep43492-s1.pdf]
